# Supplementary material
Source: Springer Nature journal article supplement (https://www.springermedizin.de/resource/supplementary/12990_2010_315_MOESM4_ESM.pdf/9613014)
Supplement: MOESM4 [file 9613014]

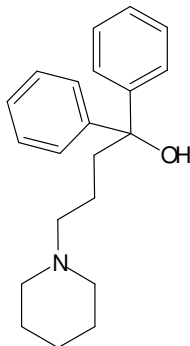

difenidol

Connectivity Score: -0.775  
p-value: 0.0006

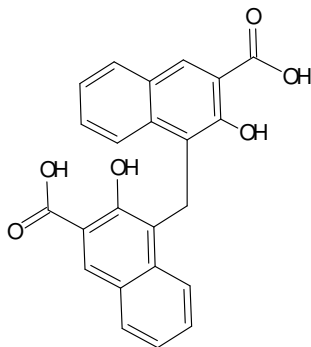

pyrvinium

Connectivity Score: -0.5652  
p-value: 0.0006

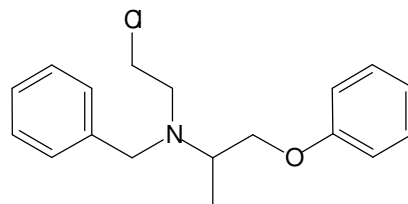

phenoxybenzamine

Connectivity Score: -0.677  
p-value: 0.0015

ABS

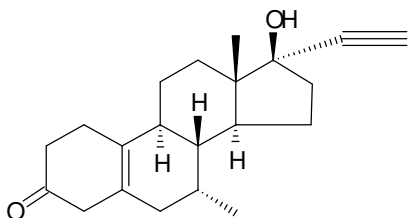

noretynodrel

Connectivity Score: -0.6643  
p-value: 0.0022

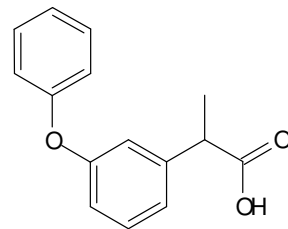

fenoprofen

Connectivity Score: -0.5678  
p-value: 0.0029
